# Supplementary material for: Synthesis of In2S3microspheres using a template-free and surfactant-less hydrothermal process and their visible light photocatalysis
Source: Royal Society of Chemistry journal article supplement (doi:10.1039/c4ce00836g), 2014-07-09
Supplement: c4ce00836g1.pdf [file c4ce00836g1.pdf]

Supporting Information

## Synthesis of $\text{In}_2\text{S}_3$ Microspheres using a Template-free and Surfactant-less Hydrothermal Process and Their Visible Light Photocatalysis

Arpan Kumar Nayak,<sup>1</sup> Seungwon Lee,<sup>2</sup> Youngku Sohn,<sup>2</sup> Debabrata Pradhan<sup>1,\*</sup>

<sup>1</sup>Materials Science Centre, Indian Institute of Technology, Kharagpur 721 302, W.B., India

<sup>2</sup>Department of Chemistry, Yeungnam University, Gyeongsan 712-749, Republic of Korea

[\\*deb@matssc.iitkgp.ernet.in](mailto:deb@matssc.iitkgp.ernet.in)

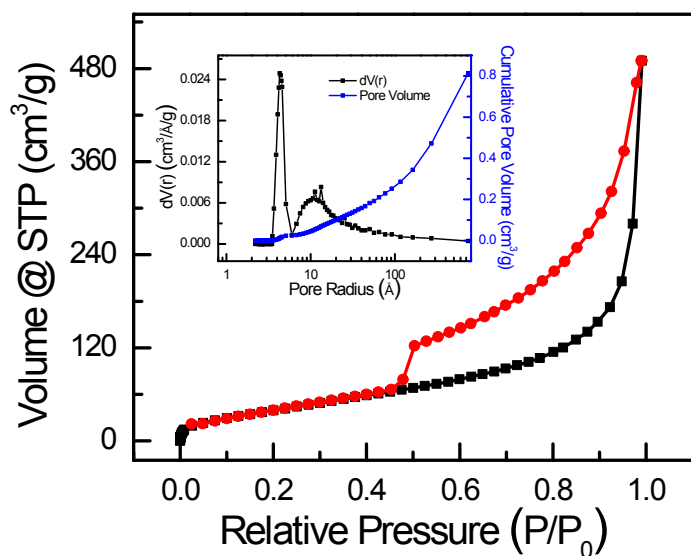

**Figure S1.** Nitrogen adsorption-desorption isotherm for hollow  $\text{In}_2\text{S}_3$  microspheres obtained with indium sulfate precursor (adsorption branch, ■; desorption branch, ●). Inset: BJH pore size distribution obtained from the adsorption branch.

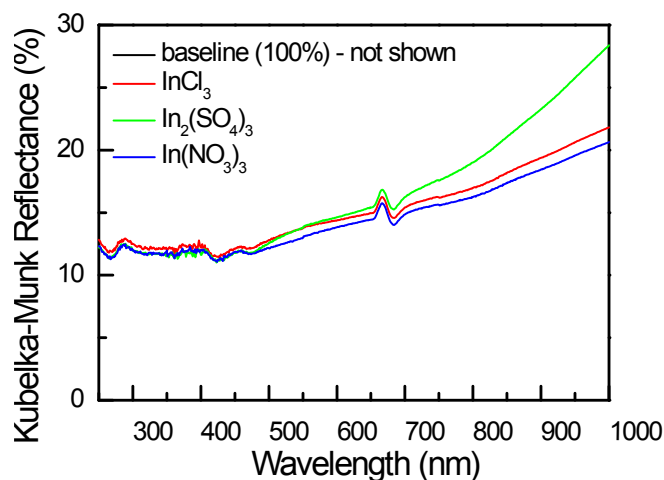

**Figure S2.** UV-Vis absorption spectra (in reflectance mode) of black color  $\text{In}_2\text{S}_3$  powder samples prepared with indium chloride, indium sulfate and indium nitrate precursors. Other parameters were kept constant (L-Cystine as S source, oxalic acid,  $150^\circ\text{C}$ , and 30 h).

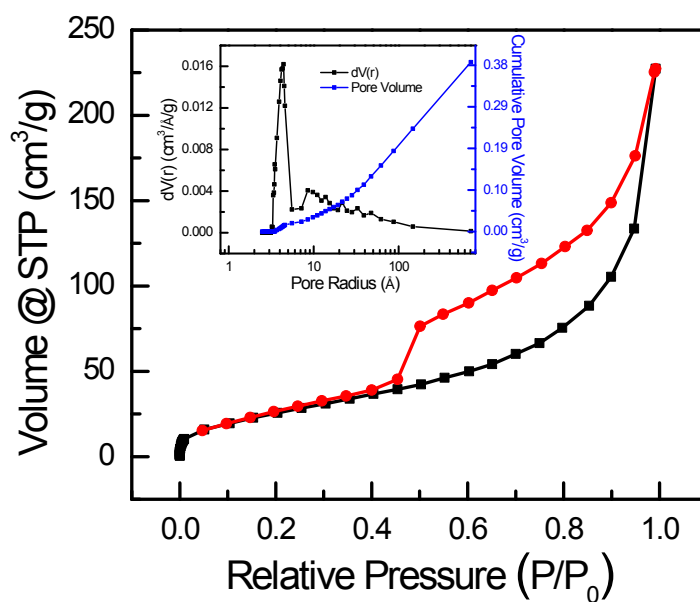

**Figure S3.** Nitrogen adsorption-desorption isotherm for agglomerated  $\text{In}_2\text{S}_3$  nanoflakes obtained with indium sulfate precursor without oxalic acid (adsorption branch, ■; desorption branch, ●). Inset: BJH pore size distribution obtained from the adsorption branch.

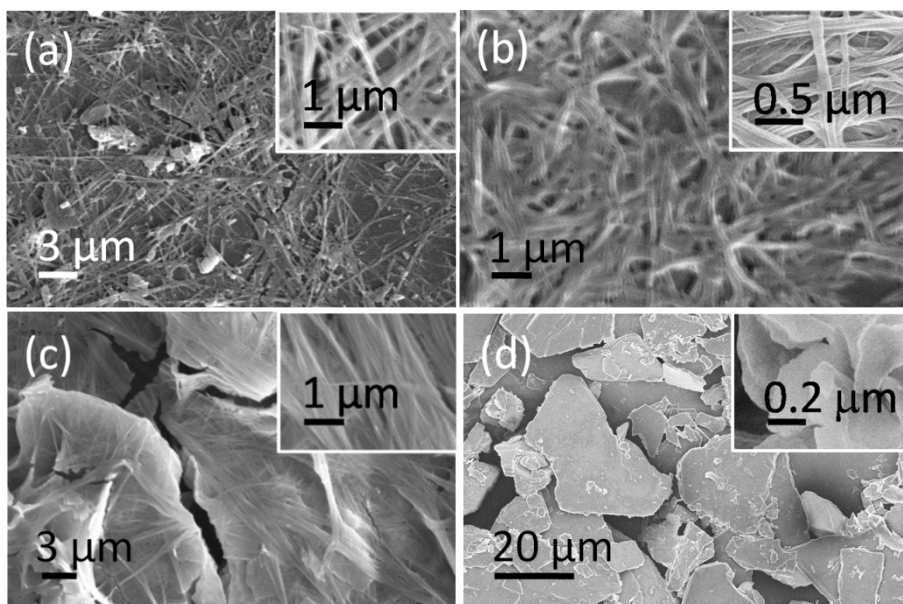

**Figure S4.** FESEM images of products obtained by stirring (a) indium chloride, (b) indium sulfate, (c) indium nitrate, with L-cystine and oxalic acid at room temperature, (d) indium sulfate and L-cystine, without oxalic acid. Inset shows the respective magnified FESEM image.

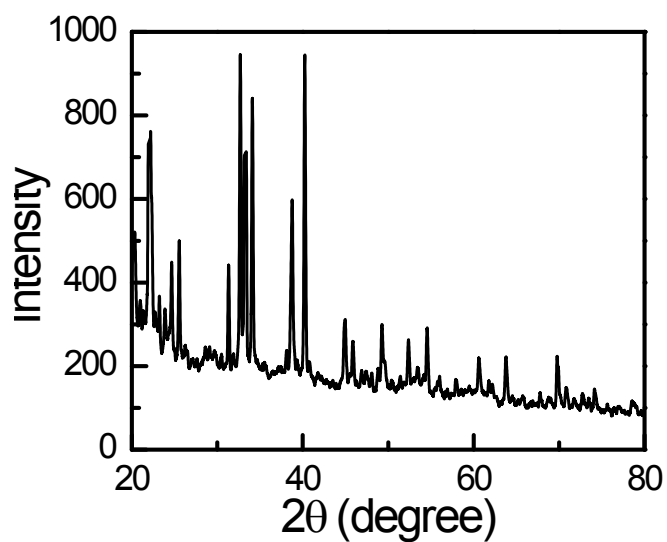

**Figure S5.** X-ray diffraction pattern of the product obtained by stirring indium sulfate, L-cystine and oxalic acid at room temperature
